# Supplementary material
Source: MDPI journal article supplement (https://www.mdpi.com/2079-6412/13/12/2026)
Supplement: s1 [file s1]

**Table S3.** Verification of fungal growth in laboratory and environmental conditions for selected facade coatings

| No<br>. | 1 year                                                                             |                                                                                     | 2 years                                                                             |                                                                                      | 3 years                                                                               |                                                                                       |
|---------|------------------------------------------------------------------------------------|-------------------------------------------------------------------------------------|-------------------------------------------------------------------------------------|--------------------------------------------------------------------------------------|---------------------------------------------------------------------------------------|---------------------------------------------------------------------------------------|
|         | Laboratory                                                                         | Environmental                                                                       | Laboratory                                                                          | Environmental                                                                        | Laboratory                                                                            | Environmental                                                                         |
| 5       |    |    |    |    |    |    |
| 6       |    |    |    |    |    |    |
| 10      |   |   |   |   |   |   |
| 11      |  |  |  |  |  |  |
| 12      |  |  |  |  |  |  |
| 13      |  |  |  |  |  |  |
| 14      |  |  |  |  |  |  |
