# Supplementary material
Source: MDPI journal article supplement (https://www.mdpi.com/2079-6412/13/12/2026)
Supplement: s1 [file s1 › Table S1.pdf]

**Table S1.** Fungal growth on tested facade coatings after 28 days of incubation (5 repetitions).

| Plaster no. | View                                                                                 |
|-------------|--------------------------------------------------------------------------------------|
| 1           | 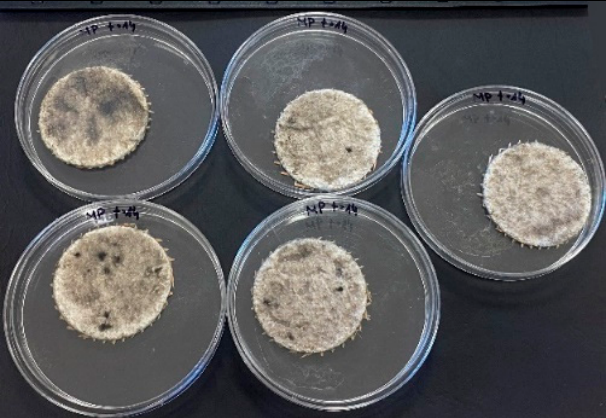   |
| 2           | 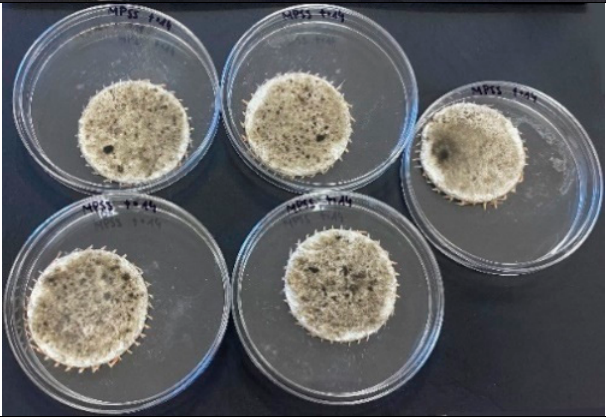  |
| 3           | 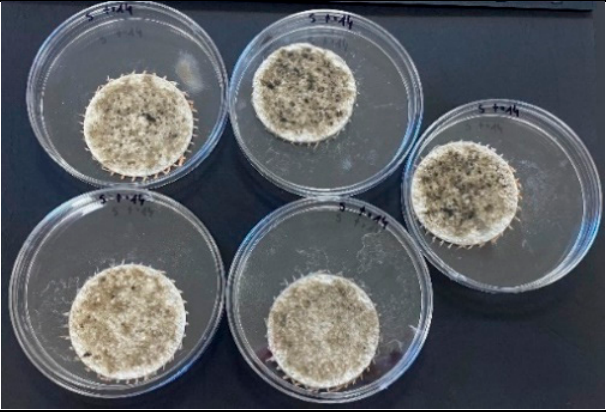 |
| 4           | 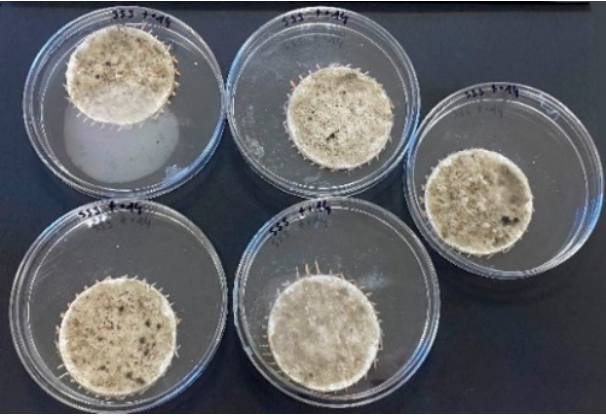 |
